# Supplementary material
Source: MDPI journal article supplement (https://www.mdpi.com/2071-1050/12/11/4633)
Supplement: s1 [file s1]

## Sheet: Sheet1
		Table S1. Unconfined compressive strength results of all performed tests.
	Cement Content (%)	UCS 1.4kN/m3			UCS 1.6kN/m3			η/(Xiv)0.32 1.4kN/m3			η/(Xiv)0.32 1.6kN/m3
		7 Day	28 Day	60 Day	7 Day	28 Day	60 Day	7 Day	28 Day	60 Day	7 Day	28 Day	60 Day
Clay+Cement (CC)	7	1605.37	1720.32	2051.46	1801.85	1947	3505.18	34.3142	32.7022	33.4108	29.1752	27.2133	27.4353
	10	1677.56	1794.35	3175.94	2679.47	3035.5	3870.28	29.8258	29.0327	29.9803	25.4493	24.7017	25.6922
	13	2110.04	2340.1	3515.4	3524.81	3748.38	5644.84	28.2042	26.8528	28.1421	23.866	23.0612	23.1292
Clay+Cement+Slag (CCS)	7	1073.42	1406.34	1748.19	1531.68	1980.41	2578.16	32.462	31.5304	30.2478	27.7022	26.7231	27.4204
	10	1583.33	2163.85	3022.26	2183.94	2783.19	3639.66	28.2152	29.0708	27.8924	22.8502	24.6235	23.8896
	13
Clay+Cement+Lime (CCL)	7	2381.72	3684.99	3777.93	3652.54	4757.83	4983.41	22.8251	23.8283	25.3151	18.4583	18.2843	20.0773
	10	2497.5	4729.18	4804.86	4567.58	5065.14	7195.45	22.9436	19.9943	22.0237	18.4227	17.9899	18.1539
	13
Clay+Cement+Lime+Slag (CCLS)	7	1784.06	2622.2	3239.03	1937.26	4572.54	6415.32	27.5264	27.7839	29.0295	24.4976	24.0058	21.513
	10	2190.69	2927.99	4024.53	3033.09	3791.82	6391.84	24.8212	25.2463	24.5328	21.0092	21.9023	20.6445
	13	2656.21	5050	5905.25	4705.87	6094.17	8084.13	21.1337	19.603	20.3792	17.4179	17.2599	16.9365
